# Supplementary material
Source: PubMed Central journal article supplement (PMC6511775)
Supplement: ajtr0011-2056-f9.pdf [file ajtr0011-2056-f9.pdf]

## KGN and TGF- $\beta$ 3 support SF-MSCs for cartilage regeneration

**Table S1.** ICRS macroscopic evaluation of cartilage repair

| Categories                                                                                      | Scores |
|-------------------------------------------------------------------------------------------------|--------|
| Degree of defect repair                                                                         |        |
| In level with surrounding cartilage                                                             | 4      |
| 75% repair of defect depth                                                                      | 3      |
| 50% repair of defect depth                                                                      | 2      |
| 25% repair of defect depth                                                                      | 1      |
| No repair of defect depth                                                                       | 0      |
| Integration to border zone                                                                      |        |
| Complete integration with surrounding cartilage                                                 | 4      |
| Demarcating border_1 mm                                                                         | 3      |
| Three-quarters of graft integrated, one-quarter with a<br>Notable border_1 mm in width          | 2      |
| One-half of graft integrated with surrounding<br>Cartilage, one-half with a notable border_1 mm | 1      |
| From no contact to one-quarter of graft integrated<br>With surrounding cartilage                | 0      |
| Macroscopic appearance                                                                          |        |
| Intact smooth surface                                                                           | 4      |
| Fibrillated surface                                                                             | 3      |
| Small, scattered fissures or cracks                                                             | 2      |
| Several small or few large fissures                                                             | 1      |
| Total degeneration of grafted area                                                              | 0      |
| Overall repair assessment                                                                       |        |
| Grade I: normal                                                                                 | 12     |
| Grade II: nearly normal                                                                         | 8-11   |
| Grade III: abnormal                                                                             | 4-7    |
| Grade IV: severely abnormal                                                                     | 1-3    |

**Table S2.** ICRS visual histological assessment scale

| Features                        | Scores |
|---------------------------------|--------|
| Surface                         |        |
| Smooth/continuous               | 3      |
| Discontinuities/irregularities  | 0      |
| Matrix                          |        |
| Hyaline                         | 3      |
| Mixture: hyaline/fibrocartilage | 2      |
| Fibrocartilage                  | 1      |
| Fibrous tissue                  | 0      |
| Cell distribution               |        |
| Columnar                        | 3      |
| Mixed/columnar-clusters         | 2      |
| Clusters                        | 1      |
| Individual cells/disorganized   | 0      |
| Cell population viability       |        |
| Predominantly viable            | 2      |
| Partially viable                | 1      |
| <10% viable                     | 0      |
| Subchondral Bone                |        |

## KGN and TGF- $\beta$ 3 support SF-MSCs for cartilage regeneration

|                                                |        |
|------------------------------------------------|--------|
| Normal                                         | 3      |
| Increased remodeling                           | 2      |
| Bone necrosis/granulation tissue               | 1      |
| Detached/fracture/callus at base               | 0      |
| Cartilage mineralization (calcified cartilage) |        |
| Normal                                         | 1      |
| Abnormal/inappropriate location                | 0      |
| Toluidine blue stain                           |        |
| Normal                                         | 4      |
| Slight reduction                               | 3      |
| Moderate reduction                             | 2      |
| Severe reduction                               | 1      |
| No staining                                    | 0      |
| Type II collagen staining of the matrix        |        |
| Normal or nearly normal                        | 3      |
| Moderate staining                              | 2      |
| Slight staining                                | 1      |
| None                                           | 0      |
|                                                | Max 25 |

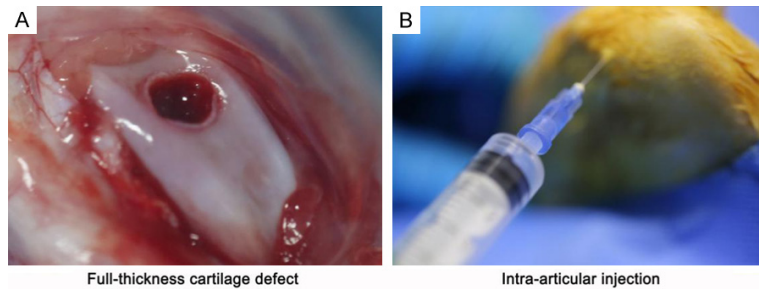

**Figure S1.** A. A cartilage defect with a 4.0 mm diameter and a 2.5 mm depth was successfully created on the trochlear groove of the knee. B. The intra-articular injection procedure of rabbit SF-MSCs combined with TGF- $\beta$ 3 and KGN was completed successfully three weeks following the model operation.
